# Supplementary material for: Study on the Surface of Cobalt-Chromium Dental Alloys and Their Behavior in Oral Cavity as Cast Materials
Source: MDPI journal article supplement (doi:10.3390/ma15093052), 2022-04-22
Supplement: s1 [file s1]

Supplementary Material

# Study on the Surface of Cobalt–Chromium Dental Alloys and Their Behavior in Oral Cavity as Cast Materials

The additional information is from the alloy samples process of fabrication: Figures S1 and S2 cutting the start material and surface finishing method.

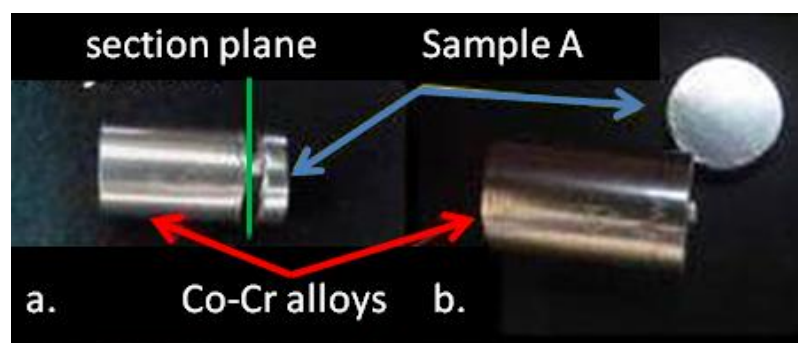

**Figure S1.** (a,b) Sectioning the Cobalt-Chrome alloy cylinders in horizontal plane.

**Citation:** Uriciuc, W.A.; Boșca, A.B.; Băbțan, A.-M.; Vermeșan, H.; Cristea, C.; Tertiș, M.; Pășcuță, P.; Borodi, G.; Suci, M.; Barbu-Tudoran, L.; et al. Study on the Surface of Cobalt–Chromium Dental Alloys and Their Behavior in Oral Cavity as Cast Materials. *Materials* **2022**, *15*, 3052. <https://doi.org/10.3390/ma15093052>

Academic Editor: Iulian Vasile Antoniac

Received: 30 November 2021

Accepted: 21 March 2022

Published: 22 April 2022

**Publisher's Note:** MDPI stays neutral with regard to jurisdictional claims in published maps and institutional affiliations.

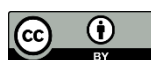

**Copyright:** © 2022 by the authors. Licensee MDPI, Basel, Switzerland. This article is an open access article distributed under the terms and conditions of the Creative Commons Attribution (CC BY) license (<https://creativecommons.org/licenses/by/4.0/>).

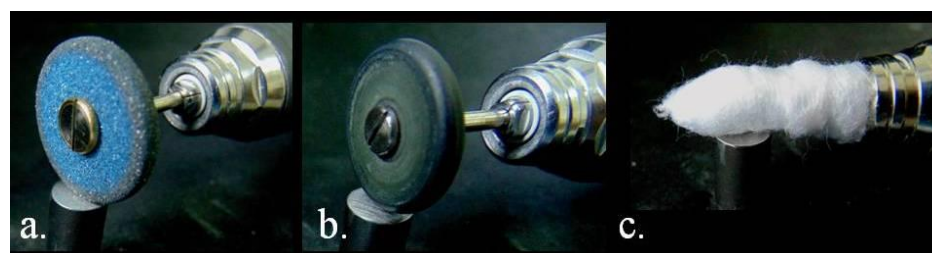

**Figure S2.** Mechanical processing; (a) abrasive tools; (b) rubber; (c) fibers (cotton wool).

Figure S2 and S3 present the method of fabrication for Samples P- cast alloy.

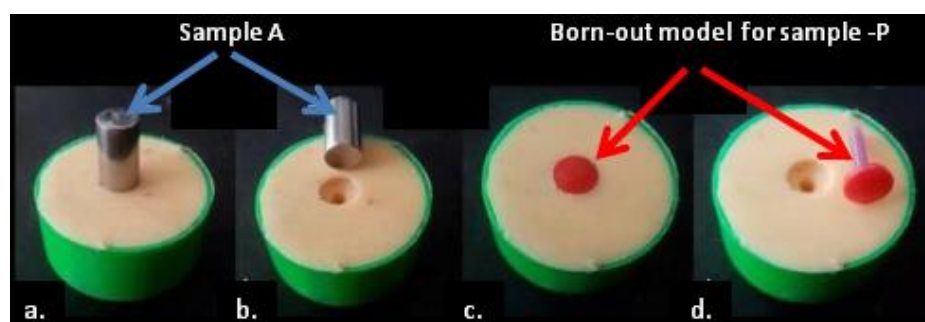

**Figure S3.** Duplicating silicone mold: (a,b) The shape of sample A transposed into the silicone material; (c,d) Fabrication of the born-out model of sample P.

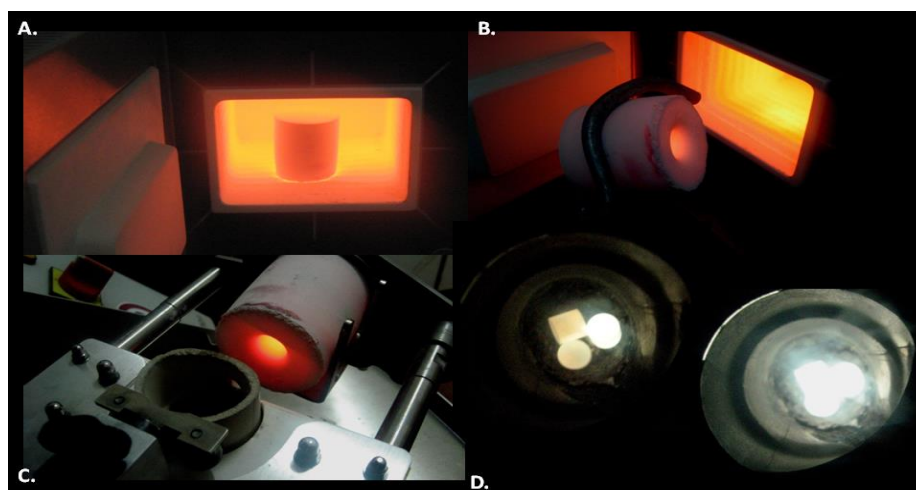

**Figure S4.** (a) Refractory mould inside the preheating furnace; (b) Extraction of the refractory mould from the preheating furnace; (c) Positioning the mold in the melting-casting machine; d. Melting the Co-Cr alloy in a ceramic crucible.

In Figure S5 is present the set up program for heat treated surface of Samples P:

The oven can be programmed with the following operating parameters (Figure S5):

- B: starting temperature inside the oven (500°C);
- S: time when the oven lid closes (2 min.);
- t: speed of temperature increase (50°C / min);
- T: final temperature (980°C);
- H: time to maintain the enclosure at the final temperature (1min.);
- V1: temperature at which the vacuum pump is activated (500°C);
- V2: temperature at which the vacuum pump is deactivated (979°C);
- L: temperature up to which the enclosure can be cooled slowly.

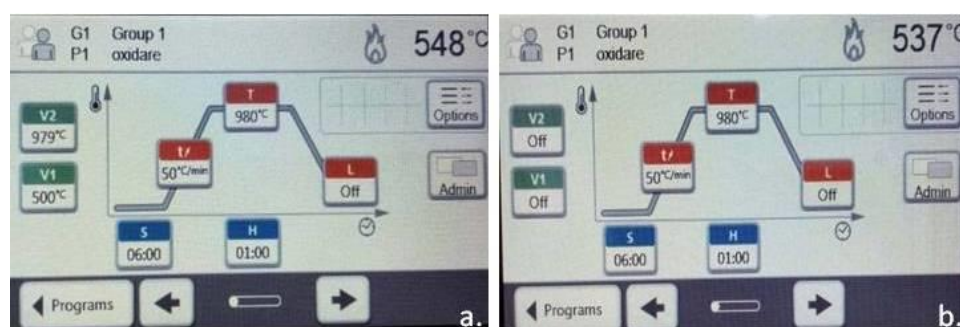

**Figure S5.** TTO parameters on the heating furnace interface: (a) Heat treatment parameters for OTI1 and OTI2; (b) Heat treatment parameters for OC3.

Figure S6 and S7 show the electrochemical cell that was develop by the author and the sample insertion.

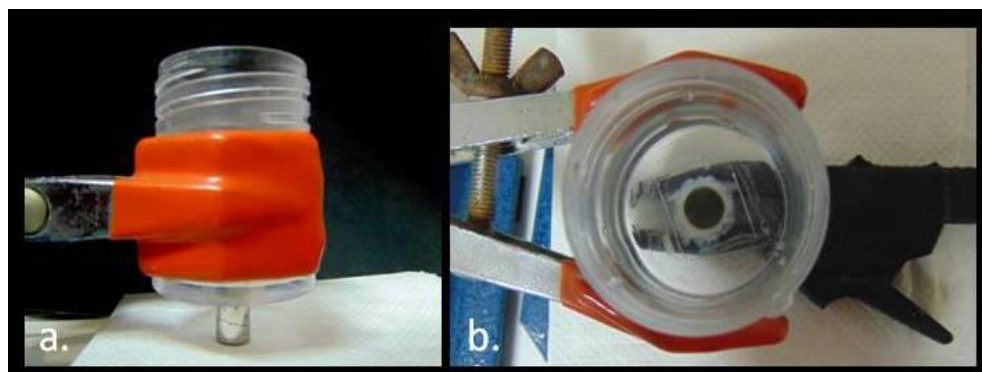

**Figure S6.** (a) Working electrode coupled to the electrochemical cell containing the electrolyte; (b) The electrolyte in the enclosure in contact with the working electrode and the connection of the working electrode to the potentiostat through a crocodile type connector.

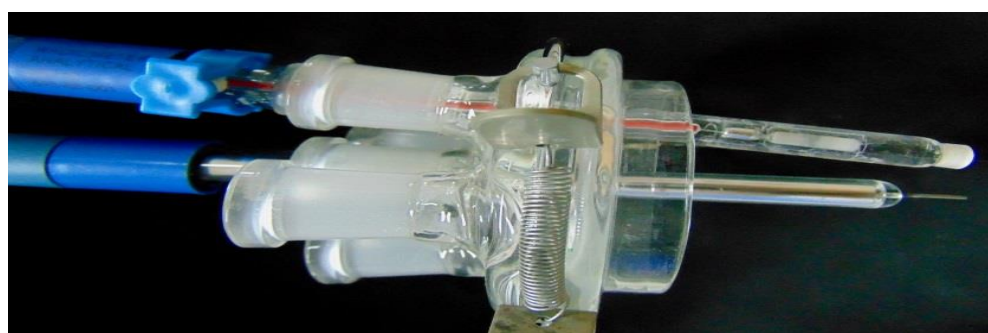

**Figure S7.** The location of the reference electrode and the counter electrode on the dedicated stand.

Figure S8 and S9 show the elemental distribution on the EDS analyzed surface for samples

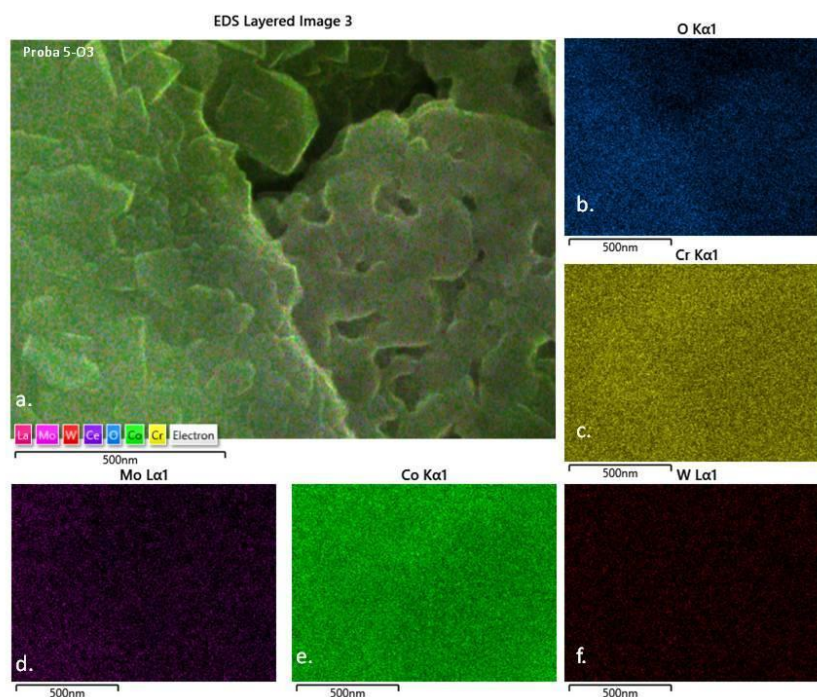

**Figure S8.** Elemental distribution on the analyzed surface EDS for sample 5-O3: (a) the overview; (b) Oxygen (O); (c) Chromium (Cr); (d) Molybdenum (Mo); (e) Cobalt (Co); (f) Wolfram (W).



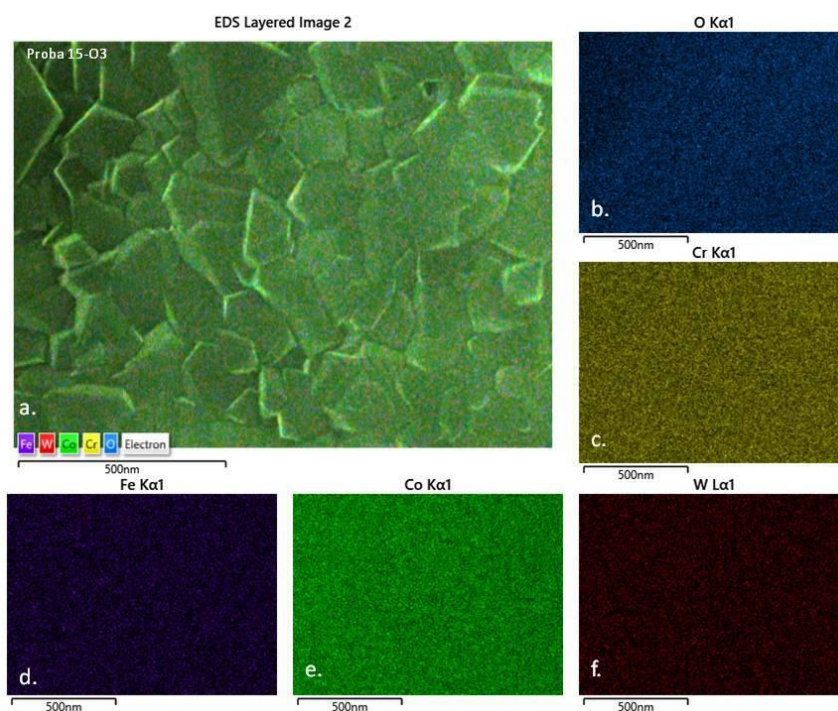

**Figure S9.** Elemental distribution on the EDS analyzed surface for sample 15-O3; (a) overview; (b) Oxygen (O); (c) Chromium (Cr); (d) Iron (Fe); (e) Cobalt (Co); (f) Wolfram (W).
